# Supplementary material
Source: publisher site journal article supplement (https://www.dovepress.com/get_supplementary_file.php?f=334601.docx)
Supplement: Supplementary file 1 [file get_supplementary_file.php]

**Supplementary materials**

**Supplementary material S1: Autophagy-related gene from HADb**

| AMBRA1 | CCR2 | GRID1 | NRG1 | TMEM74 |
| --- | --- | --- | --- | --- |
| APOL1 | CD46 | GRID2 | NRG2 | TNFSF10 |
| ARNT | CDKN1A | HDAC1 | NRG3 | TP53 |
| ARSA | CDKN1B | HDAC6 | P4HB | TP53INP2 |
| ARSB | CDKN2A | HGS | PARK2 | TP63 |
| ATF4 | CFLAR | HIF1A | PARP1 | TP73 |
| ATF6 | CHMP2B | HSP90AB1 | PEA15 | TSC1 |
| ATG10 | CHMP4B | HSPA5 | PELP1 | TSC2 |
| ATG12 | CLN3 | HSPA8 | PEX14 | TUSC1 |
| ATG16L1 | CTSB | HSPB8 | PEX3 | ULK1 |
| ATG16L2 | CTSD | IFNG | PIK3C3 | ULK2 |
| ATG2A | CTSL1 | IKBKB | PIK3R4 | ULK3 |
| ATG2B | CX3CL1 | IKBKE | PINK1 | USP10 |
| ATG3 | CXCR4 | IL24 | PPP1R15A | UVRAG |
| ATG4A | DAPK1 | IRGM | PRKAB1 | VAMP3 |
| ATG4B | DAPK2 | ITGA3 | PRKAR1A | VAMP7 |
| ATG4C | DDIT3 | ITGA6 | PRKCD | VEGFA |
| ATG4D | DIRAS3 | ITGB1 | PRKCQ | WDFY3 |
| ATG5 | DLC1 | ITGB4 | PTEN | WDR45 |
| ATG7 | DNAJB1 | ITPR1 | PTK6 | WDR45L |
| ATG9A | DNAJB9 | KIAA0226 | RAB11A | WIPI1 |
| ATG9B | DRAM1 | KIAA0652 | RAB1A | WIPI2 |
| ATIC | EDEM1 | KIAA0831 | RAB24 | ZFYVE1 |
| BAG1 | EEF2 | KIF5B | RAB33B |  |
| BAG3 | EEF2K | KLHL24 | RAB5A |  |
| BAK1 | EGFR | LAMP1 | RAB7A |  |
| BAX | EIF2AK2 | LAMP2 | RAC1 |  |
| BCL2 | EIF2AK3 | MAP1LC3A | RAF1 |  |
| BCL2L1 | EIF2S1 | MAP1LC3B | RB1 |  |
| BECN1 | EIF4EBP1 | MAP1LC3C | RB1CC1 |  |
| BID | EIF4G1 | MAP2K7 | RELA |  |
| BIRC5 | ERBB2 | MAPK1 | RGS19 |  |
| BIRC6 | ERN1 | MAPK3 | RHEB |  |
| BNIP1 | ERO1L | MAPK8 | RPS6KB1 |  |
| BNIP3 | FADD | MAPK8IP1 | RPTOR |  |
| BNIP3L | FAM48A | MAPK9 | SAR1A |  |
| C12orf44 | FAS | MBTPS2 | SERPINA1 |  |
| C17orf88 | FKBP1A | MLST8 | SESN2 |  |
| CALCOCO2 | FKBP1B | MTMR14 | SH3GLB1 |  |
| CAMKK2 | FOS | MTOR | SIRT1 |  |
| CANX | FOXO1 | MYC | SIRT2 |  |
| CAPN1 | FOXO3 | NAF1 | SPHK1 |  |
| CAPN10 | GAA | NAMPT | SPNS1 |  |
| CAPN2 | GABARAP | NBR1 | SQSTM1 |  |
| CAPNS1 | GABARAPL1 | NCKAP1 | ST13 |  |
| CASP1 | GABARAPL2 | NFE2L2 | STK11 |  |
| CASP3 | GAPDH | NFKB1 | Symbol |  |
| CASP4 | GNAI3 | NKX2-3 | TBK1 |  |
| CASP8 | GNB2L1 | NLRC4 | TM9SF1 |  |
| CCL2 | GOPC | NPC1 | TMEM49 |  |

**Supplementary Table S1 Univariate cox results of ARlncRNAs based on TCGA-LUAD data.**

| lncRNA | KM | B | SE | HR | HR.95L | HR.95H | p-value |
| --- | --- | --- | --- | --- | --- | --- | --- |
| AC123595.1 | 0.00413112 | 0.8477666 | 0.26322784 | 0.42837059 | 0.25571706 | 0.71759531 | 0.00127897 |
| HSPC324 | 0.00132721 | 0.5994472 | 0.20368475 | 0.54911511 | 0.36837201 | 0.8185405 | 0.00325033 |
| LINC00996 | 0.03569093 | 0.5629686 | 0.20824425 | 0.56951591 | 0.37865879 | 0.85657163 | 0.0068633 |
| AC067852.3 | 0.01649158 | 0.4984604 | 0.24240032 | 0.60746518 | 0.37773729 | 0.97690631 | 0.03974858 |
| AC090948.1 | 0.00633026 | 0.4898576 | 0.19803236 | 0.61271365 | 0.41561586 | 0.90328127 | 0.01337504 |
| LINC01150 | 0.03985352 | 0.4538606 | 0.18812867 | 0.63517125 | 0.43929414 | 0.91838809 | 0.01584349 |
| AC087752.3 | 0.00202198 | 0.4307452 | 0.1533367 | 0.65002453 | 0.48129274 | 0.87791039 | 0.00496731 |
| AC124045.1 | 0.01423362 | 0.4050944 | 0.19956505 | 0.66691382 | 0.45102398 | 0.98614277 | 0.04236806 |
| LINC02198 | 0.01131084 | 0.3995612 | 0.16324892 | 0.67061425 | 0.48698439 | 0.92348641 | 0.0143828 |
| UGDH-AS1 | 0.02024565 | 0.3962062 | 0.17100126 | 0.67286792 | 0.48125282 | 0.94077629 | 0.02050491 |
| AF131215.6 | 0.04314299 | 0.3799383 | 0.16154697 | 0.68390364 | 0.49829426 | 0.93865055 | 0.01867906 |
| AC027020.2 | 0.02689581 | 0.3780353 | 0.15413528 | 0.6852063 | 0.50654865 | 0.92687579 | 0.014182 |
| AL035587.1 | 0.0044778 | 0.3640467 | 0.15108094 | 0.69485876 | 0.5167687 | 0.93432264 | 0.01596943 |
| AC106047.1 | 0.02368682 | 0.3635865 | 0.14275821 | 0.69517858 | 0.52550926 | 0.91962842 | 0.01086941 |
| FENDRR | 0.00787117 | 0.3561039 | 0.13897157 | 0.70039981 | 0.53340024 | 0.91968443 | 0.01039446 |
| AL136304.1 | 0.03184099 | 0.3284388 | 0.13745639 | 0.72004699 | 0.54999374 | 0.94267922 | 0.01687575 |
| LINC02062 | 0.01686802 | 0.3217101 | 0.15696915 | 0.7249083 | 0.53293064 | 0.9860421 | 0.0404121 |
| AF131215.5 | 0.00777709 | 0.3176526 | 0.13536803 | 0.7278556 | 0.55823846 | 0.94900981 | 0.01894634 |
| AC068594.1 | 0.00755753 | 0.3062027 | 0.15350636 | 0.73623738 | 0.54494542 | 0.99467846 | 0.04607309 |
| AL034397.3 | 0.00153431 | 0.2976274 | 0.10974353 | 0.74257794 | 0.59886396 | 0.92078006 | 0.00668731 |
| POLR2J4 | 0.03683655 | 0.2910342 | 0.13739966 | 0.74749011 | 0.57101912 | 0.9784987 | 0.03416168 |
| ARHGEF26-AS1 | 0.00085655 | 0.2849833 | 0.12538159 | 0.75202681 | 0.58817738 | 0.96152002 | 0.02303053 |
| AL513550.1 | 0.00637231 | 0.2843148 | 0.13927649 | 0.75252975 | 0.57275819 | 0.98872619 | 0.04121414 |
| AC026355.1 | 0.00015203 | 0.2764897 | 0.08187047 | 0.75844145 | 0.64600189 | 0.89045163 | 0.00073238 |
| AL391069.3 | 0.00140867 | 0.2686374 | 0.12518538 | 0.7644204 | 0.59810066 | 0.9769903 | 0.03187963 |
| GAS6-AS1 | 0.00057976 | 0.2674247 | 0.10161527 | 0.76534794 | 0.62713906 | 0.9340153 | 0.00849494 |
| AC011477.2 | 6.75E-05 | 0.2582862 | 0.07438995 | 0.77237416 | 0.6675855 | 0.89361114 | 0.00051649 |
| LINC00654 | 0.00948711 | 0.2578819 | 0.11558495 | 0.77268644 | 0.61605177 | 0.96914638 | 0.02567429 |
| MMP2-AS1 | 0.01108221 | 0.2568834 | 0.09619489 | 0.77345841 | 0.64055397 | 0.93393835 | 0.00757503 |
| AL137003.1 | 0.01479158 | 0.2480189 | 0.11664273 | 0.78034519 | 0.62086944 | 0.98078367 | 0.03347723 |
| HCG18 | 0.00078166 | 0.2310013 | 0.11159037 | 0.7937384 | 0.63781026 | 0.98778695 | 0.03844455 |
| AC090559.1 | 0.00113723 | 0.2174466 | 0.08163302 | 0.80457056 | 0.68561132 | 0.9441702 | 0.00772844 |
| AC092171.3 | 0.04433599 | 0.21176 | 0.09015055 | 0.80915886 | 0.67810588 | 0.96553957 | 0.01882594 |
| AL022323.1 | 0.03194301 | 0.206742 | 0.09534432 | 0.81322946 | 0.67461481 | 0.98032559 | 0.03013039 |
| AC026369.3 | 0.03770634 | 0.2038471 | 0.09079732 | 0.81558709 | 0.6826271 | 0.97444462 | 0.02476312 |
| MGC32805 | 0.01137477 | 0.201283 | 0.08214241 | 0.81768103 | 0.69608804 | 0.96051394 | 0.01426919 |
| VIM-AS1 | 0.00235727 | 0.1978747 | 0.06379206 | 0.82047265 | 0.72404275 | 0.92974533 | 0.00192302 |
| AC012615.1 | 0.00269104 | 0.1881859 | 0.07908681 | 0.82846072 | 0.70950116 | 0.96736581 | 0.01733686 |
| ZNF674-AS1 | 0.00156144 | 0.1687646 | 0.0806168 | 0.84470773 | 0.72124917 | 0.9892991 | 0.03631193 |
| SH3BP5-AS1 | 0.00649848 | 0.1629198 | 0.065518 | 0.84965931 | 0.74726698 | 0.96608167 | 0.0128955 |
| AL691432.2 | 0.00537043 | 0.162305 | 0.05145081 | 0.85018184 | 0.76862908 | 0.94038747 | 0.00160737 |
| AC008764.2 | 0.01277149 | 0.1613604 | 0.05867271 | 0.85098536 | 0.75854227 | 0.95469444 | 0.00595631 |
| AL035701.1 | 0.04662434 | 0.1612184 | 0.07974176 | 0.85110619 | 0.72795988 | 0.99508472 | 0.04320157 |
| AC024075.2 | 0.02188899 | 0.1597255 | 0.05116075 | 0.85237776 | 0.7710526 | 0.94228053 | 0.00179608 |
| AL118558.3 | 0.02136634 | 0.1528319 | 0.07445003 | 0.85827395 | 0.74174385 | 0.99311127 | 0.04009077 |
| RPARP-AS1 | 0.04599804 | 0.1526008 | 0.05990691 | 0.85847237 | 0.76336715 | 0.96542641 | 0.01085605 |
| ATP13A4-AS1 | 0.01756868 | 0.1467316 | 0.07048401 | 0.86352575 | 0.75210624 | 0.99145132 | 0.03736342 |
| AC004687.1 | 0.01763849 | 0.1457675 | 0.05579407 | 0.86435866 | 0.77482208 | 0.96424188 | 0.0089857 |

**Supplementary Table S2 correlation analysis of lncRNA and mRNA**

| gene | LncRNA | correlation | corPval |
| --- | --- | --- | --- |
| BIRC6 | AL606489.1 | 0.52857261 | 4.07E-37 |
| WDFY3 | AL606489.1 | 0.5177278 | 1.99E-35 |
| CFLAR | HLA-DQB1-AS1 | 0.44415458 | 1.92E-25 |
| EIF2AK2 | AL606489.1 | 0.43921198 | 7.44E-25 |
| PTEN | AL606489.1 | 0.43722926 | 1.27E-24 |
| ATG16L2 | HLA-DQB1-AS1 | 0.42672906 | 2.06E-23 |
| TSC2 | AL691432.2 | 0.41842089 | 1.74E-22 |
| ATG16L2 | AL691432.2 | 0.38072968 | 1.37E-18 |
| ATG7 | AL606489.1 | 0.37797255 | 2.52E-18 |
| MAP2K7 | AL691432.2 | 0.37630437 | 3.64E-18 |
| DAPK2 | AL691432.2 | 0.37587927 | 4.00E-18 |
| ATG2B | AL606489.1 | 0.37402254 | 6.00E-18 |
| NCKAP1 | AL606489.1 | 0.36443453 | 4.68E-17 |
| NAF1 | AL606489.1 | 0.35691953 | 2.23E-16 |
| WDFY3 | HLA-DQB1-AS1 | 0.35424068 | 3.86E-16 |
| CASP1 | HLA-DQB1-AS1 | 0.3504782 | 8.25E-16 |
| MBTPS2 | AL606489.1 | 0.34982341 | 9.40E-16 |
| SESN2 | AL691432.2 | 0.34936436 | 1.03E-15 |
| PEX14 | AL691432.2 | 0.34719851 | 1.59E-15 |
| CCR2 | HLA-DQB1-AS1 | 0.34300168 | 3.62E-15 |
| ATG2B | HLA-DQB1-AS1 | 0.34153816 | 4.82E-15 |
| GAPDH | LINC01116 | 0.3401053 | 6.36E-15 |
| ULK3 | AL691432.2 | 0.33912437 | 7.68E-15 |
| NLRC4 | HLA-DQB1-AS1 | 0.33695152 | 1.17E-14 |
| BIRC6 | HLA-DQB1-AS1 | 0.3369379 | 1.17E-14 |
| RB1CC1 | AL606489.1 | 0.33059212 | 3.87E-14 |
| TBK1 | AL606489.1 | 0.32782134 | 6.48E-14 |
| CFLAR | AL606489.1 | 0.32565619 | 9.65E-14 |
| PIK3C3 | AL606489.1 | 0.32315009 | 1.52E-13 |
| MLST8 | LINC01137 | 0.31807384 | 3.80E-13 |
| PTEN | HLA-DQB1-AS1 | 0.31465545 | 6.96E-13 |
| CASP8 | AL606489.1 | 0.30356973 | 4.70E-12 |
| ATG4B | AL691432.2 | 0.30061876 | 7.71E-12 |
| PEX14 | LINC01137 | 0.29768327 | 1.25E-11 |
| CASP8 | HLA-DQB1-AS1 | 0.29695824 | 1.41E-11 |
| MAPK8 | AL606489.1 | 0.29323442 | 2.60E-11 |
| KIF5B | AL606489.1 | 0.27137942 | 7.72E-10 |
| ATG7 | HLA-DQB1-AS1 | 0.2685328 | 1.18E-09 |
| ATIC | LINC01116 | 0.25202218 | 1.22E-08 |
| NLRC4 | AL606489.1 | 0.23300969 | 1.49E-07 |
| DAPK2 | HLA-DQB1-AS1 | 0.22185278 | 5.86E-07 |
| ITGB1 | LINC01116 | 0.20770114 | 3.02E-06 |
| EIF2AK2 | HLA-DQB1-AS1 | 0.1967038 | 9.99E-06 |
| EIF2AK3 | AL606489.1 | 0.19573359 | 1.11E-05 |
| EIF2S1 | LINC01116 | 0.17832407 | 6.40E-05 |
| ITGB1 | AL606489.1 | 0.17584614 | 8.11E-05 |
| PIK3C3 | HLA-DQB1-AS1 | 0.17317864 | 0.00010429 |
| MLST8 | AL691432.2 | 0.15578296 | 0.00049121 |
| RB1CC1 | HLA-DQB1-AS1 | 0.15380946 | 0.00057997 |
| GAPDH | LINC01137 | 0.14619657 | 0.00108079 |
| NAF1 | HLA-DQB1-AS1 | 0.14305711 | 0.00138541 |
| TSC2 | HLA-DQB1-AS1 | 0.14027091 | 0.00171991 |
| CCR2 | AL606489.1 | 0.13491283 | 0.00257917 |
| ATIC | LINC01137 | 0.12209976 | 0.00642274 |
| GABARAP | LINC01137 | 0.10766908 | 0.01633871 |
| ATG2B | AL691432.2 | 0.10431937 | 0.02001122 |
| MBTPS2 | LINC01116 | 0.09963876 | 0.02633518 |
| ULK3 | LINC01137 | 0.09820783 | 0.02858395 |
| ATG16L2 | AL606489.1 | 0.09643781 | 0.03159204 |
| SESN2 | HLA-DQB1-AS1 | 0.0924812 | 0.03930719 |
| NCKAP1 | LINC01116 | 0.08993995 | 0.04506037 |
| CCR2 | AL691432.2 | -0.0881384 | 0.04955454 |
| PEX14 | HLA-DQB1-AS1 | -0.0883002 | 0.04913625 |
| CFLAR | LINC01116 | -0.0890477 | 0.04724149 |
| MAP2K7 | AL606489.1 | -0.0934549 | 0.03727392 |
| GABARAP | LINC01116 | -0.0934974 | 0.03718737 |
| EIF2S1 | LINC01137 | -0.1028815 | 0.02179608 |
| NLRC4 | LINC01116 | -0.1082073 | 0.0158073 |
| CASP1 | LINC01116 | -0.1136342 | 0.01124017 |
| CCR2 | LINC01116 | -0.1142543 | 0.01080119 |
| ATG7 | LINC01137 | -0.1209645 | 0.00693706 |
| CFLAR | LINC01137 | -0.1235986 | 0.0057962 |
| KIF5B | AL691432.2 | -0.1256304 | 0.00503463 |
| NCKAP1 | HLA-DQB1-AS1 | -0.1281502 | 0.00421602 |
| TBK1 | LINC01137 | -0.1289273 | 0.00398904 |
| ULK3 | LINC01116 | -0.131382 | 0.00334281 |
| ATG16L2 | LINC01116 | -0.132385 | 0.00310731 |
| NCKAP1 | LINC01137 | -0.1333126 | 0.00290304 |
| RB1CC1 | AL691432.2 | -0.1369549 | 0.00221377 |
| EIF2AK2 | AL691432.2 | -0.1388933 | 0.00191132 |
| EIF2S1 | HLA-DQB1-AS1 | -0.1430487 | 0.00138632 |
| PTEN | LINC01137 | -0.1572855 | 0.00043229 |
| DAPK2 | LINC01116 | -0.1603784 | 0.00033112 |
| MLST8 | AL606489.1 | -0.1647426 | 0.00022543 |
| EIF2AK2 | LINC01137 | -0.1714712 | 0.00012226 |
| MLST8 | HLA-DQB1-AS1 | -0.1788524 | 6.08E-05 |
| CCR2 | LINC01137 | -0.183958 | 3.69E-05 |
| NLRC4 | LINC01137 | -0.1841954 | 3.61E-05 |
| ITGB1 | HLA-DQB1-AS1 | -0.1958279 | 1.10E-05 |
| MBTPS2 | AL691432.2 | -0.2008307 | 6.42E-06 |
| WDFY3 | LINC01137 | -0.2071754 | 3.20E-06 |
| GABARAP | HLA-DQB1-AS1 | -0.2186005 | 8.62E-07 |
| NAF1 | LINC01137 | -0.2229405 | 5.14E-07 |
| ATIC | AL691432.2 | -0.2231946 | 4.99E-07 |
| TBK1 | AL691432.2 | -0.2260514 | 3.53E-07 |
| PEX14 | AL606489.1 | -0.2364293 | 9.64E-08 |
| BIRC6 | LINC01137 | -0.2386591 | 7.24E-08 |
| ATG7 | AL691432.2 | -0.2492932 | 1.77E-08 |
| PIK3C3 | LINC01137 | -0.2602951 | 3.86E-09 |
| RB1CC1 | LINC01137 | -0.2671801 | 1.43E-09 |
| NCKAP1 | AL691432.2 | -0.269806 | 9.75E-10 |
| GAPDH | HLA-DQB1-AS1 | -0.2739775 | 5.24E-10 |
| ATG2B | LINC01137 | -0.2757114 | 4.03E-10 |
| GAPDH | AL691432.2 | -0.2980224 | 1.19E-11 |
| MAPK8 | LINC01137 | -0.3027505 | 5.39E-12 |
| EIF2S1 | AL691432.2 | -0.3141617 | 7.59E-13 |
| ATIC | HLA-DQB1-AS1 | -0.3146787 | 6.93E-13 |
| ITGB1 | AL691432.2 | -0.3164053 | 5.11E-13 |
| KIF5B | LINC01137 | -0.3210559 | 2.23E-13 |
| EIF2AK3 | LINC01137 | -0.3335338 | 2.23E-14 |
| GABARAP | AL606489.1 | -0.3844115 | 5.99E-19 |

**Supplementary Table S3 Gene set enrichment of gene ontology and KEGG pathway analysis results based on the signature of five ARlncRNAs.**

KEGG pathways upregulated in high risk group. (Top 20)

| NAME | SIZE | ES | NES | NOM p-val | FDR q-val | |
| --- | --- | --- | --- | --- | --- | --- |
| KEGG_PATHWAYS_IN_CANCER | 325 | 0.42748 | 1.78080 | 0.00000 | 0.02720 |
| KEGG_NEUROACTIVE_LIGAND_RECEPTOR_INTERACTION | 271 | 0.42945 | 1.78704 | 0.00000 | 0.02621 |
| KEGG_MAPK_SIGNALING_PATHWAY | 267 | 0.41901 | 1.75845 | 0.00000 | 0.03033 |
| KEGG_CYTOKINE_CYTOKINE_RECEPTOR_INTERACTION | 264 | 0.68900 | 2.43532 | 0.00000 | 0.00000 |
| KEGG_REGULATION_OF_ACTIN_CYTOSKELETON | 213 | 0.51938 | 2.14575 | 0.00000 | 0.00000 |
| KEGG_FOCAL_ADHESION | 199 | 0.65102 | 2.31420 | 0.00000 | 0.00000 |
| KEGG_CHEMOKINE_SIGNALING_PATHWAY | 188 | 0.61453 | 2.28188 | 0.00000 | 0.00000 |
| KEGG_ENDOCYTOSIS | 181 | 0.45767 | 1.93035 | 0.00000 | 0.01015 |
| KEGG_JAK_STAT_SIGNALING_PATHWAY | 155 | 0.58855 | 2.24599 | 0.00000 | 0.00000 |
| KEGG_NATURAL_KILLER_CELL_MEDIATED_CYTOTOXICITY | 132 | 0.63656 | 2.31449 | 0.00000 | 0.00000 |
| KEGG_TIGHT_JUNCTION | 132 | 0.43398 | 1.83360 | 0.00000 | 0.01800 |
| KEGG_CELL_ADHESION_MOLECULES_CAMS | 131 | 0.69815 | 2.25947 | 0.00000 | 0.00000 |
| KEGG_AXON_GUIDANCE | 129 | 0.47176 | 1.85426 | 0.00000 | 0.01588 |
| KEGG_LYSOSOME | 121 | 0.65095 | 2.15336 | 0.00000 | 0.00000 |
| KEGG_LEUKOCYTE_TRANSENDOTHELIAL_MIGRATION | 116 | 0.68300 | 2.42025 | 0.00000 | 0.00000 |
| KEGG_VASCULAR_SMOOTH_MUSCLE_CONTRACTION | 114 | 0.46583 | 1.88595 | 0.00000 | 0.01258 |
| KEGG_T_CELL_RECEPTOR_SIGNALING_PATHWAY | 108 | 0.54450 | 1.89040 | 0.00000 | 0.01182 |
| KEGG_TOLL_LIKE_RECEPTOR_SIGNALING_PATHWAY | 102 | 0.54660 | 2.08415 | 0.00000 | 0.00119 |
| KEGG_GNRH_SIGNALING_PATHWAY | 101 | 0.38912 | 1.63407 | 0.00000 | 0.05928 |
| KEGG_MELANOGENESIS | 101 | 0.34906 | 1.48155 | 0.00000 | 0.10176 |

KEGG pathways upregulated in low risk group.

| NAME | SIZE | ES | NES | NOM p-val | FDR q-val |
| --- | --- | --- | --- | --- | --- |
| KEGG_SPLICEOSOME | 127 | -0.5884 | -2.0380 | 0.0000 | 0.0170 |
| KEGG_DRUG_METABOLISM_CYTOCHROME_P450 | 71 | -0.5508 | -1.9819 | 0.0000 | 0.0175 |
| KEGG_RNA_DEGRADATION | 59 | -0.5182 | -1.7919 | 0.0000 | 0.0432 |
| KEGG_GLUTATHIONE_METABOLISM | 49 | -0.5038 | -1.7227 | 0.0000 | 0.0625 |
| KEGG_NUCLEOTIDE_EXCISION_REPAIR | 44 | -0.5794 | -1.8150 | 0.0000 | 0.0387 |
| KEGG_RNA_POLYMERASE | 29 | -0.5800 | -1.8365 | 0.0000 | 0.0349 |
| KEGG_HOMOLOGOUS_RECOMBINATION | 28 | -0.7554 | -2.0053 | 0.0000 | 0.0153 |
| KEGG_GLYCOSYLPHOSPHATIDYLINOSITOL_GPI_ANCHOR_BIOSYNTHESIS | 25 | -0.7012 | -2.0288 | 0.0000 | 0.0149 |
| KEGG_METABOLISM_OF_XENOBIOTICS_BY_CYTOCHROME_P450 | 69 | -0.5975 | -2.0849 | 0.0200 | 0.0611 |
| KEGG_RETINOL_METABOLISM | 64 | -0.4970 | -1.7472 | 0.0208 | 0.0557 |
| KEGG_PARKINSONS_DISEASE | 128 | -0.5927 | -1.9256 | 0.0213 | 0.0194 |
| KEGG_CARDIAC_MUSCLE_CONTRACTION | 79 | -0.4489 | -1.6694 | 0.0213 | 0.0854 |
| KEGG_OXIDATIVE_PHOSPHORYLATION | 132 | -0.6340 | -2.0120 | 0.0217 | 0.0178 |
| KEGG_PORPHYRIN_AND_CHLOROPHYLL_METABOLISM | 40 | -0.5701 | -1.9543 | 0.0217 | 0.0183 |
| KEGG_DNA_REPLICATION | 36 | -0.6859 | -1.9071 | 0.0222 | 0.0221 |
| KEGG_MISMATCH_REPAIR | 23 | -0.6947 | -2.0715 | 0.0222 | 0.0340 |
| KEGG_PENTOSE_AND_GLUCURONATE_INTERCONVERSIONS | 28 | -0.6496 | -2.0574 | 0.0227 | 0.0226 |
| KEGG_HUNTINGTONS_DISEASE | 181 | -0.5156 | -1.9353 | 0.0233 | 0.0202 |
| KEGG_ALZHEIMERS_DISEASE | 166 | -0.4802 | -1.8456 | 0.0455 | 0.0314 |

Gene ontology terms upregulated in high risk group. (Top 20)

| NAME | SIZE | ES | NES | NOM p-val | FDR q-val |
| --- | --- | --- | --- | --- | --- |
| GO_ENDOTHELIAL_CELL_PROLIFERATION | 184 | 0.600444 | 2.689750 | 0 | 0 |
| GO_SPECIFIC_GRANULE | 159 | 0.710602 | 2.651219 | 0 | 0 |
| GO_POSITIVE_REGULATION_OF_VASCULATURE_DEVELOPMENT | 219 | 0.636391 | 2.632058 | 0 | 0 |
| GO_POSITIVE_REGULATION_OF_ENDOTHELIAL_CELL_PROLIFERATION | 108 | 0.632300 | 2.608887 | 0 | 0 |
| GO_EPITHELIAL_CELL_APOPTOTIC_PROCESS | 114 | 0.620563 | 2.599583 | 0 | 0 |
| GO_ESTABLISHMENT_OF_ENDOTHELIAL_BARRIER | 46 | 0.736491 | 2.576434 | 0 | 0 |
| GO_REGULATION_OF_VASCULATURE_DEVELOPMENT | 404 | 0.577970 | 2.567617 | 0 | 0 |
| GO_LIPOPOLYSACCHARIDE_MEDIATED_SIGNALING_PATHWAY | 59 | 0.720272 | 2.566856 | 0 | 0 |
| GO_ENDOTHELIUM_DEVELOPMENT | 131 | 0.626331 | 2.564729 | 0 | 0 |
| GO_ACTOMYOSIN | 74 | 0.720546 | 2.562250 | 0 | 0 |
| GO_RHO_PROTEIN_SIGNAL_TRANSDUCTION | 140 | 0.644519 | 2.554861 | 0 | 0 |
| GO_ENDOTHELIAL_CELL_MIGRATION | 262 | 0.560661 | 2.551415 | 0 | 0 |
| GO_POSITIVE_REGULATION_OF_EXTRINSIC_APOPTOTIC_SIGNALING_PATHWAY | 51 | 0.701859 | 2.548006 | 0 | 0 |
| GO_BLOOD_VESSEL_REMODELING | 40 | 0.754788 | 2.543048 | 0 | 0 |
| GO_CELLULAR_RESPONSE_TO_MOLECULE_OF_BACTERIAL_ORIGIN | 213 | 0.664079 | 2.533833 | 0 | 0 |
| GO_EXTRACELLULAR_MATRIX_DISASSEMBLY | 82 | 0.693339 | 2.524456 | 0 | 0 |
| GO_SPECIFIC_GRANULE_MEMBRANE | 90 | 0.749925 | 2.521352 | 0 | 0 |
| GO_ACTIN_FILAMENT_BUNDLE | 71 | 0.722392 | 2.519366 | 0 | 0 |
| GO_LYMPH_VESSEL_MORPHOGENESIS | 20 | 0.840788 | 2.512942 | 0 | 0 |
| GO_POSITIVE_REGULATION_OF_ENDOTHELIAL_CELL_MIGRATION | 124 | 0.599242 | 2.512341 | 0 | 0 |

Gene ontology terms upregulated in low risk group. (Top 20)

| NAME | SIZE | ES | NES | NOM p-val | FDR q-val |
| --- | --- | --- | --- | --- | --- |
| GO_U12_TYPE_SPLICEOSOMAL_COMPLEX | 29 | -0.75702 | -2.23650 | 0 | 0.017292 |
| GO_RNA_METHYLATION | 83 | -0.63102 | -2.03911 | 0 | 0.07497 |
| GO_NADH_DEHYDROGENASE_COMPLEX_ASSEMBLY | 65 | -0.75559 | -2.04688 | 0 | 0.07539 |
| GO_PROTEIN_MANNOSYLATION | 23 | -0.69581 | -1.97206 | 0 | 0.07554 |
| GO_U2_SNRNP | 23 | -0.73207 | -2.05591 | 0 | 0.07599 |
| GO_OXIDATIVE_PHOSPHORYLATION | 146 | -0.67331 | -1.97431 | 0 | 0.07736 |
| GO_PRECATALYTIC_SPLICEOSOME | 53 | -0.67199 | -2.10158 | 0 | 0.07748 |
| GO_INNER_EAR_RECEPTOR_CELL_DEVELOPMENT | 43 | -0.52451 | -2.00865 | 0 | 0.07893 |
| GO_TRNA_METHYLATION | 39 | -0.67463 | -1.96371 | 0 | 0.07941 |
| GO_RESPIRATORY_CHAIN_COMPLEX_IV_ASSEMBLY | 25 | -0.78523 | -1.97545 | 0 | 0.07970 |
| GO_U2_TYPE_SPLICEOSOMAL_COMPLEX | 93 | -0.62481 | -1.98755 | 0 | 0.08110 |
| GO_PRESPLICEOSOME | 17 | -0.72060 | -1.85295 | 0 | 0.08269 |
| GO_NADH_DEHYDROGENASE_ACTIVITY | 46 | -0.74772 | -1.85635 | 0 | 0.08279 |
| GO_PROTEIN_O_LINKED_MANNOSYLATION | 18 | -0.67978 | -1.87549 | 0 | 0.08325 |
| GO_MITOCHONDRIAL_TRANSCRIPTION | 15 | -0.73133 | -1.99014 | 0 | 0.08380 |
| GO_ENDORIBONUCLEASE_ACTIVITY_PRODUCING_5_PHOSPHOMONOESTERS | 29 | -0.66417 | -1.85641 | 0 | 0.08394 |
| GO_TERMINATION_OF_RNA_POLYMERASE_II_TRANSCRIPTION | 35 | -0.65433 | -1.87866 | 0 | 0.08412 |
| GO_ATP_TRANSMEMBRANE_TRANSPORTER_ACTIVITY | 26 | -0.59403 | -1.84585 | 0 | 0.08442 |
| GO_CYTOCHROME_COMPLEX_ASSEMBLY | 36 | -0.73799 | -1.88583 | 0 | 0.08458 |
| GO_TETRAPYRROLE_BIOSYNTHETIC_PROCESS | 27 | -0.60001 | -1.87673 | 0 | 0.08495 |
